## KINETICS OF ATP- AND Na<sup>+</sup>-GRADIENT DRIVEN Ca<sup>2+</sup> TRANSPORT IN BASOLATERAL MEMBRANES FROM GILLS OF FRESHWATER- AND SEAWATER-ADAPTED TILAPIA

P. M. VERBOST, TH. J. M. SCHOENMAKERS, G. FLIK  
AND S. E. WENDELAAR BONGA

*Department of Animal Physiology, Faculty of Science, University of Nijmegen,  
Toernooiveld, NL-6525 ED Nijmegen, The Netherlands*

*Accepted 16 September 1993*

### Summary

Plasma membranes of the gills of freshwater- and seawater-adapted tilapia were analyzed for Ca<sup>2+</sup>-ATPase and Na<sup>+</sup>/Ca<sup>2+</sup> exchange activity. The relative importance of ATP-driven and Na<sup>+</sup>-gradient-driven Ca<sup>2+</sup> transport in Ca<sup>2+</sup> extrusion was evaluated on the basis of kinetic analyses *in vitro*. The Na<sup>+</sup>/Ca<sup>2+</sup> exchangers in branchial membranes from freshwater or seawater fish displayed similar kinetics. The ATP-driven Ca<sup>2+</sup> pump, however, showed a somewhat lower affinity for Ca<sup>2+</sup> in membranes isolated from seawater gills than in membranes from freshwater gills; no difference in  $V_{\max}$  was found. The activity of the exchanger was estimated to be 50 % of that of the ATP-driven pump at prevailing cytosolic Ca<sup>2+</sup> concentrations ( $10^{-7}$  mol l<sup>-1</sup>).

Opercular ionocyte densities and branchial Na<sup>+</sup>/K<sup>+</sup>-ATPase content were not significantly different in fish residing in fresh water or sea water. We conclude that the gills of tilapia living for prolonged periods in fresh water or sea water do not differ in the make-up of their basolateral membrane with regard to Ca<sup>2+</sup>-ATPase, Na<sup>+</sup>/Ca<sup>2+</sup> exchange and Na<sup>+</sup>/K<sup>+</sup>-ATPase activity. Apparently, the densities of these carriers suffice for calcium and sodium homeostasis under these vastly different ambient conditions.

### Introduction

The major fraction of calcium absorbed by freshwater fish is taken up directly from the water *via* the gills (Fenwick, 1989). Flux ratio analysis indicates that this uptake is transcellular: the electrochemical potential for a passive Ca<sup>2+</sup> flux is directed outwards and, at the same time, a significant Ca<sup>2+</sup> influx occurs (Perry and Flik, 1988). Moreover, the branchial epithelium of freshwater fish is generally considered to be a tight epithelium with a minimal paracellular flux of ions and water (Wendelaar Bonga *et al.* 1983; Ogasawara and Hirano, 1984). In a current model for transbranchial Ca<sup>2+</sup> uptake (Flik *et al.* 1985c), Ca<sup>2+</sup> enters the ionocytes (also called chloride cells) through Ca<sup>2+</sup> channels in the apical membrane (the rate-limiting step; Verbost *et al.* 1993) and is transported

Key words: Ca<sup>2+</sup>-ATPase, Na<sup>+</sup>/Ca<sup>2+</sup> exchanger, Na<sup>+</sup>/K<sup>+</sup>-ATPase, plasma membranes, chloride cells, fish gills, tilapia, *Oreochromis mossambicus*.

across the basolateral membrane to the serosa by a high-affinity  $\text{Ca}^{2+}$ -ATPase. High-affinity  $\text{Ca}^{2+}$ -ATPase activity has been demonstrated in the basolateral membranes of the ionocytes of tilapia, eel and trout (Flik *et al.* 1985*b,c*; Perry and Flik, 1988). There is good evidence that stanniocalcin inhibits the transcellular  $\text{Ca}^{2+}$  influx by limiting the entrance of  $\text{Ca}^{2+}$  at the apical membrane (Verbost *et al.* 1993).

In the basolateral membrane of some  $\text{Ca}^{2+}$ -transporting epithelia, ATP-dependent  $\text{Ca}^{2+}$  transport as well as  $\text{Na}^+/\text{Ca}^{2+}$  exchanger activity have been demonstrated (Van Os, 1987; Taylor, 1989). The relative importance of exchanger-mediated and ATP-driven  $\text{Ca}^{2+}$  transport in active  $\text{Ca}^{2+}$  absorption may differ among tissues. In rat intestinal and renal epithelia, the ATP-driven  $\text{Ca}^{2+}$  pump is responsible for the major part of the transcellular  $\text{Ca}^{2+}$  transport (Ghijssen *et al.* 1983; Van Heeswijk *et al.* 1984); the exchanger appears to provide an emergency system for removal of excess  $\text{Ca}^{2+}$  from the cytosol (Van Os, 1987). In the intestine of tilapia, the species studied here, however, the exchanger forms the main driving force for the absorption of  $\text{Ca}^{2+}$  (Flik *et al.* 1990).

No data are available on  $\text{Na}^+/\text{Ca}^{2+}$  exchange activity in branchial  $\text{Ca}^{2+}$  uptake. We present here the first direct evidence for a basolateral  $\text{Na}^+/\text{Ca}^{2+}$  exchanger in fish branchial epithelium in studies with vesicles isolated from plasma membranes. In previous studies on the ATP-driven  $\text{Ca}^{2+}$  pump in fish gills (Flik *et al.* 1985*c*) it was shown that the capacity of this pump was sufficient to explain the whole-body uptake. The finding of exchange activity in membranes containing  $\text{Ca}^{2+}$ -ATPase encouraged us to determine its importance relative to that of ATP-driven transport.

Bearing in mind the differences in  $\text{Na}^+$  turnover in freshwater and seawater fish (Maetz, 1974; Evans, 1979) and the presence of a sodium-dependent  $\text{Ca}^{2+}$  transport mechanism in gills (in addition to the classical ATP-dependent  $\text{Ca}^{2+}$  pump), we compared these mechanisms in gills of freshwater- and seawater-adapted tilapia. We thus hoped to obtain information about the physiological importance of both transporters in freshwater and seawater gills by examining possible adaptive responses in the enzyme kinetics.

## Materials and methods

### *Holding conditions of fish*

Male freshwater tilapia *Oreochromis mossambicus* (Peters) from laboratory stock, weighing around 250 g, were held in 100 l tanks. The aquaria were supplied with running tap water ( $0.7 \text{ mmol l}^{-1} \text{ Ca}^{2+}$ ,  $25^\circ\text{C}$ ) under a 12 h:12 h light:dark photoperiod. Animals were fed Trouvit fish pellets (Trouw and Co., Putten, The Netherlands) at a rate of 1.5 % body mass per day.

Artificial sea water was prepared by dissolving natural sea salt (Wimex, Krefeld, Germany) to a density of  $1.022 \text{ g l}^{-1}$ . Fish were first transferred to half-strength sea water and, after 1 day, to full-strength sea water. Fish were kept in sea water for at least 8 weeks before experimentation ( $8.5 \text{ mmol l}^{-1} \text{ Ca}^{2+}$ ,  $25^\circ\text{C}$ ). Food was supplied at 1.5 % body mass per day.

### *Plasma analysis*

For the analysis of blood plasma calcium, sodium, potassium and chloride contents, a

blood sample was taken by puncture from the caudal vessels using a heparinized syringe with a 23-gauge needle. Blood cells were removed by centrifugation (1 min, 10 000 g) and the plasma was stored at -20 °C until further analysis. Plasma calcium contents were measured colorimetrically using a calcium kit (Sigma Diagnostics). Plasma sodium and potassium contents were determined with a flame photometer (FLM3, Radiometer) coupled to an autoanalyzer (SA-20, Skalar). Plasma chloride content was determined colorimetrically using the method of Zall *et al.* (1956).

#### *Analysis of chloride cell density*

One branchial operculum from each fish was removed and incubated for 1 h in a well-aerated 2 μmol l<sup>-1</sup> solution of 2-(dimethylaminostyryl)-1-ethylpyridiniumiodide (DASPEI), which stains the mitochondria-rich chloride cells. After rinsing, the inner opercular epithelium was examined in a Zeiss fluorescence microscope at a magnification of 250×. Cells were counted in 20 different squares of the opercular epithelium with a total surface area of 5 mm<sup>2</sup> per fish. The density of chloride cells is presented as the number of cells per surface area of the inner operculum.

#### *Membrane biology*

Plasma membranes were isolated from gill tissue scraped off the gill arches as described in detail previously (Flik *et al.* 1985c). In brief, after homogenization of gill scrapings, blood cells and cellular debris were separated from the membrane fraction by centrifugation. The membranes (from the supernatant) were collected by ultracentrifugation. The fluffy top layer from the resulting pellet was resuspended in buffer using a Dounce homogenizer. This membrane suspension was centrifuged differentially and the basolateral membranes in the resulting supernatant were collected by pelleting. The procedure yields membrane suspensions in which 47–51 % of the membranes are resealed vesicles. Vesicles were kept cooled on ice and were used on the day of isolation. The protein content of the vesicle preparations was 1.86±0.4 g l<sup>-1</sup> (N=12), as determined with a commercial reagent kit (Bio-Rad) using bovine serum albumin as a reference. Protein recovery was 1.67±0.16 % (N=6) in freshwater preparations; in seawater preparations, protein recovery was slightly, though significantly, lower: 1.23±0.11 % (N=6; P<0.001). Na<sup>+</sup>/K<sup>+</sup>-ATPase activity in fish branchial basolateral plasma membrane vesicles (BLMVs) was determined as described previously for similar preparations of enterocytes (Flik *et al.* 1990). Na<sup>+</sup>/K<sup>+</sup>-ATPase activity was defined as the Na<sup>+</sup>- and K<sup>+</sup>-dependent ouabain-sensitive phosphatase activity. The orientation of the vesicles was determined on the basis of the acetylcholine esterase activity measured in intact and permeabilized vesicles (reflecting the inside-out oriented vesicles, IOVs) and the specific trypsin sensitivity of the cytosol-oriented part of the Na<sup>+</sup>/K<sup>+</sup>-ATPase (reflecting the right-side-out oriented vesicles, ROVs) as described by Flik *et al.* (1990). The orientation of the vesicles was similar to previously reported values (Flik *et al.* 1985c) and not significantly different for freshwater (19.2±4.2 % IOV; 29.8±4.4 % ROV, N=6) and seawater (22.5±4.8 % IOV; 26.8±6.4 % ROV) preparations. In the calculation of Ca<sup>2+</sup> transport velocities of ATP- and Na<sup>+</sup>-

gradient-driven mechanisms, no correction for IOV content was made (see also Discussion). For determination of total  $\text{Na}^+/\text{K}^+$ -ATPase and  $\text{Ca}^{2+}$ -ATPase activities, the membrane vesicles were permeabilized with saponin (0.20 mg saponin per mg protein).

$^{45}\text{Ca}^{2+}$ -transport was determined in assay media that contained  $0.5 \text{ mmol l}^{-1}$  EGTA,  $0.5 \text{ mmol l}^{-1}$  *N*-(2-hydroxyethyl)-ethylenediamine-*N,N',N'*-triacetic acid (HEEDTA) and  $0.5 \text{ mmol l}^{-1}$  nitrilotriacetic acid (NTA) as a  $\text{Ca}^{2+}$  buffering system. Free calcium and magnesium levels were calculated using a matrix computer program (Schoenmakers *et al.* 1992) taking into account the first and second protonations of the respective ligands (ATP, EGTA, HEEDTA, NTA). In this program, the metal–chelator stability constants are corrected for the ionic strength and the temperature of the medium. All incubations were performed at  $37^\circ\text{C}$ , which is the optimum assay temperature.

The ATP-driven transport of  $^{45}\text{Ca}^{2+}$  was determined in 1 min incubations (yielding initial pump velocities; Flik *et al.* 1985c) of membrane vesicles ( $45 \mu\text{g}$  per assay) in the presence of  $3 \text{ mmol l}^{-1}$  ATP,  $150 \text{ mmol l}^{-1}$  KCl,  $20 \text{ mmol l}^{-1}$  Hepes/Tris, pH 7.4,  $0.8 \text{ mmol l}^{-1}$   $\text{Mg}^{2+}$  and the  $\text{Ca}^{2+}$  buffers mentioned above.  $^{45}\text{Ca}^{2+}$  uptakes were corrected for uptake in the absence of ATP. Free  $\text{Ca}^{2+}$  concentrations were varied from  $50 \text{ nmol l}^{-1}$  to  $1 \mu\text{mol l}^{-1}$ . The uptake was quenched by a 14-fold dilution of incubate in ice-cold isotonic buffer containing  $20 \text{ mmol l}^{-1}$  Tris–HCl (pH 7.4),  $150 \text{ mmol l}^{-1}$  KCl or NaCl and  $0.1 \text{ mmol l}^{-1}$   $\text{LaCl}_3$ . Vesicles were collected by a rapid filtration technique (Van Heeswijk *et al.* 1984; using Schleicher & Schüll ME25 filters, pore size  $0.45 \mu\text{m}$ ). Filters were rinsed twice with 2 ml of ice-cold medium and transferred to counting vials. 4 ml of Aqualuma was added per vial, filters were allowed to dissolve (30 min at room temperature) and radioactivity was determined in a Pharmacia Wallac 1410 liquid scintillation counter.

$\text{Na}^+/\text{Ca}^{2+}$  exchange activity was assayed as described previously (Flik *et al.* 1990). Briefly,  $5 \mu\text{l}$  of prewarmed membrane vesicles ( $9\text{--}12 \mu\text{g}$  protein), equilibrated with  $150 \text{ mmol l}^{-1}$  NaCl, was added to  $120 \mu\text{l}$  of medium containing  $^{45}\text{Ca}^{2+}$  and either  $150 \text{ mmol l}^{-1}$  NaCl (blank) or  $150 \text{ mmol l}^{-1}$  KCl. Ionic  $\text{Ca}^{2+}$  concentrations ranged from  $250 \text{ nmol l}^{-1}$  to  $25 \mu\text{mol l}^{-1}$ . After 5 s at  $37^\circ\text{C}$ , the reaction was stopped by addition of 1 ml of ice-cold isotonic stopping solution (as above) containing  $1 \text{ mmol l}^{-1}$   $\text{LaCl}_3$ . Vesicles were collected as described above for the ATP-dependent  $\text{Ca}^{2+}$  transport assay. The difference in  $^{45}\text{Ca}^{2+}$  accumulation after transfer to  $\text{Na}^+$  or  $\text{K}^+$  medium was taken to represent  $\text{Na}^+$ -gradient-driven  $\text{Ca}^{2+}$  transport.

#### Calculations and statistics

The  $K_m$  and  $V_{\text{max}}$  values of the ATP-dependent  $\text{Ca}^{2+}$  pump and the  $\text{Na}^+/\text{Ca}^{2+}$  exchanger were derived from best fits of the curves by non-linear regression analysis (with the Levenberg–Marquardt method) of the velocities measured as a function of substrate concentration (computer program by Leatherbarrow, 1987). Values for preparations of individual fish were averaged ( $N=5\text{--}7$ ) and used for statistical assessment of differences.

Statistical significance of differences between mean values was tested by the Mann–Whitney *U*-test. Statistical significance was accepted at  $P<0.05$ .

## Results

### Plasma analysis

Plasma osmolarity is 6 % higher in tilapia held in sea water than in those held in fresh water; plasma calcium, sodium and chloride concentrations are slightly, but not significantly, different from the values found in freshwater tilapia (Table 1), illustrating the euryhalinity of this species.

### Na<sup>+</sup>/K<sup>+</sup>-ATPase activity

As shown in Table 2, the total and specific Na<sup>+</sup>/K<sup>+</sup>-ATPase activities in the branchial epithelial homogenate of freshwater- and seawater-adapted tilapia are not significantly different. The Na<sup>+</sup>/K<sup>+</sup>-ATPase specific activity in the basolateral plasma membrane (BLM) fraction was 46 % higher in seawater preparations than in freshwater preparations but the total Na<sup>+</sup>/K<sup>+</sup>-ATPase was not significantly different for freshwater gills and seawater gills (indicating better purification of BLMs from seawater gills). Using the purification values for Na<sup>+</sup>/K<sup>+</sup>-ATPase activity in Table 2, we calculate a  $15.20/9.36=1.6$  times higher purification for this BLM marker of seawater gills than of freshwater gills ( $P<0.05$ ). This means that the BLMs from seawater gills are better purified than those from freshwater gills when they are isolated using the same procedure.

### Chloride cells

The numbers of chloride cells in the opercular membrane, which give a good reflection of the numbers in the gills (Wendelaar Bonga *et al.* 1990), are not significantly different for freshwater and seawater tilapia (Table 2).

### Na<sup>+</sup>/Ca<sup>2+</sup> exchange activity

To compare the Ca<sup>2+</sup> transport capacity in freshwater and seawater fish, we have expressed exchange relative to Na<sup>+</sup>/K<sup>+</sup>-ATPase activity (as a more specific reference). Using this comparison, the  $V_{\max}$  values ( $V_{\max, \text{corr}}$ ) are not significantly different for freshwater- and seawater-derived BLMs ( $V_{\max, \text{corr}}=V_{\max, \text{Ca}}/V_{\text{spec, Na/K-ATPase}}$ ;  $19.56 \pm 4.80 \text{ nmol Ca}^{2+} \mu\text{mol}^{-1} \text{ P}_i$  for FW and  $16.92 \pm 4.80 \text{ nmol Ca}^{2+} \mu\text{mol}^{-1} \text{ P}_i$  for seawater

Table 1. Plasma osmolarity and calcium, sodium and chloride contents of freshwater- and seawater-adapted tilapia

|                                      | Fresh water (N=12) | Sea water (N=12) |
|--------------------------------------|--------------------|------------------|
| Osmolarity (mosmol l <sup>-1</sup> ) | 327±3              | 348±5*           |
| [Calcium] (mmol l <sup>-1</sup> )    | 2.78±0.12          | 2.85±0.17        |
| [Sodium] (mmol l <sup>-1</sup> )     | 158±7              | 167±10           |
| [Chloride] (mmol l <sup>-1</sup> )   | 130±3              | 138±5            |

Values are means ± s.d.

Calcium, sodium and chloride contents are not significantly different in freshwater- and seawater-adapted fish.

\*Significantly different from the freshwater value,  $P<0.001$ .

Table 2. Total and specific Na<sup>+</sup>/K<sup>+</sup>-ATPase activity in freshwater- and seawater-adapted tilapia gill cell homogenates and purified basolateral membrane vesicles (BLMVs) and the derived BLM purification value and chloride cells density in the opercular membranes of these fish

|                     | Fresh water (N=5) | Sea water (N=7) |
|---------------------|-------------------|-----------------|
| Homogenates         |                   |                 |
| V <sub>spec</sub>   | 4.04±0.63         | 3.64±0.35       |
| V <sub>total</sub>  | 371±58            | 376±36          |
| BLMVs               |                   |                 |
| V <sub>spec</sub>   | 37.8±5.0          | 55.3±6.5*       |
| V <sub>total</sub>  | 57.1±7.6          | 70.2±8.3        |
| Percentage recovery | 15.4±1.0          | 18.7±1.2        |
| Purification        | 9.36±1.05         | 15.20±2.11*     |
| Chloride cells      | 81.0±3.5          | 90.3±4.2        |

V<sub>spec</sub>, the specific Na<sup>+</sup>/K<sup>+</sup>-ATPase activity in μmol P<sub>i</sub> h<sup>-1</sup> mg<sup>-1</sup>.

V<sub>total</sub>, the total Na<sup>+</sup>/K<sup>+</sup>-ATPase activity in μmol h<sup>-1</sup> (V<sub>spec</sub> × mg protein).

Percentage recovery, V<sub>total, BLMV</sub>/V<sub>total, Ho</sub>.

Purification, V<sub>spec, BLMV</sub>/V<sub>spec, Ho</sub>.

Chloride cells, number of chloride cells (DASPEI-stained cells) per mm<sup>2</sup> of opercular membrane.

Values are mean ± S.E.M.

\*Significantly different from the freshwater value, P<0.05.

BLMVs, basolateral plasma membrane vesicles; Ho, cell homogenates.

gills), which means that the density of the exchanger relative to Na<sup>+</sup>/K<sup>+</sup>-ATPase activity is similar. The affinities for Ca<sup>2+</sup> (K<sub>m</sub>) of the branchial Na<sup>+</sup>/Ca<sup>2+</sup> exchangers are also similar in BLMVs from freshwater- and seawater-adapted tilapia (Fig. 1).

#### ATP-driven Ca<sup>2+</sup> transport

The V<sub>max</sub> of the Ca<sup>2+</sup> pump, expressed relative to Na<sup>+</sup>/K<sup>+</sup>-ATPase activity, does not differ in BLMVs from freshwater and seawater gills (Fig. 2), indicating similar pump densities (V<sub>max, corr</sub>=V<sub>max, Ca</sub>/V<sub>spec, Na/K-ATPase</sub>; 7.50±1.08 nmol Ca<sup>2+</sup> μmol<sup>-1</sup> P<sub>i</sub> for freshwater and 7.38±0.84 nmol Ca<sup>2+</sup> μmol<sup>-1</sup> P<sub>i</sub> for seawater gills). When the values are not corrected for the difference in purification, the V<sub>max</sub> in seawater BLMs appears to be higher than in freshwater BLMs (P<0.005). The affinity of the pump for Ca<sup>2+</sup> was significantly lower in BLMVs from seawater tilapia than in BLMVs from freshwater tilapia (Fig. 2).

High-affinity Ca<sup>2+</sup>-ATPase activity, determined as Ca<sup>2+</sup>-dependent ATP hydrolysis (Flik *et al.* 1984), amounts to 2.28±0.64 μmol P<sub>i</sub> h<sup>-1</sup> mg<sup>-1</sup> and 3.87±0.85 μmol P<sub>i</sub> h<sup>-1</sup> mg<sup>-1</sup> (N=6, ± S.E.M.) for freshwater and seawater BLMs, respectively. The ratio of this Ca<sup>2+</sup>-ATPase activity to Na<sup>+</sup>/K<sup>+</sup>-ATPase activity is not significantly different for BLMs obtained from freshwater and seawater gills (2.28/37.8=0.060 and 3.87/55.3=0.070, respectively), which indicates a similar density of the Ca<sup>2+</sup>-ATPase under both conditions.

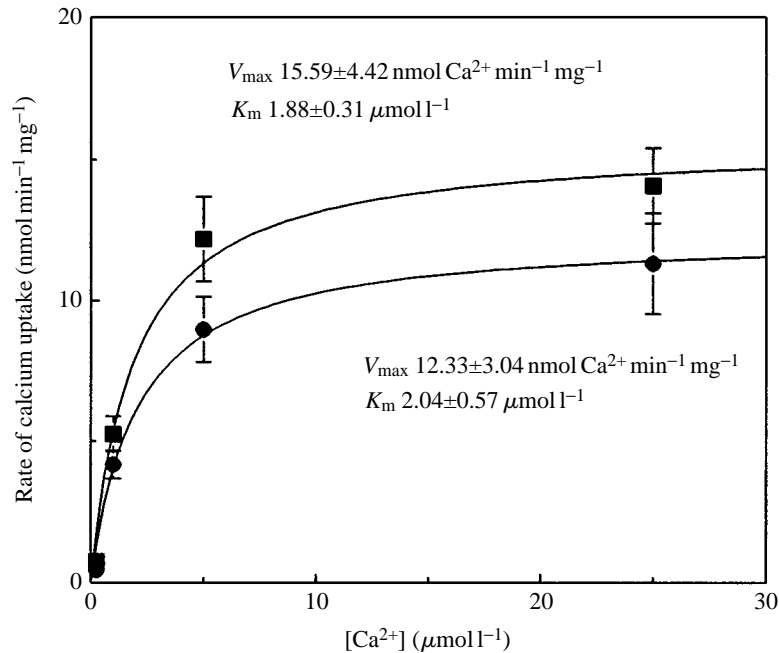

Fig. 1. Ca<sup>2+</sup>-dependence of Na<sup>+</sup>-driven Ca<sup>2+</sup> uptake in basolateral membranes from freshwater- (FW, filled circles) and seawater- (SW, filled squares) adapted tilapia. The  $V_{\max}$  and  $K_m$  values were the average values of five (for FW) to eight (for SW) gill membrane preparations (for further details see Materials and methods). These values are not significantly different. The  $V_{\max}$  values expressed relative to Na<sup>+</sup>/K<sup>+</sup>-ATPase (from Table 2), to eliminate purification differences between the FW and SW membranes, are also comparable ( $V_{\max, \text{corr}}$  for FW=19.56±4.80 nmol Ca<sup>2+</sup> μmol<sup>-1</sup> P<sub>i</sub> and for SW=16.92±4.80 nmol Ca<sup>2+</sup> μmol<sup>-1</sup> P<sub>i</sub>). Mean values ± standard errors are presented.

#### Comparison of Ca<sup>2+</sup> pump and Na<sup>+</sup>/Ca<sup>2+</sup> exchange transport activities

The kinetic data presented in Figs 1 and 2 are used to plot the potential activities of both Ca<sup>2+</sup> extrusion systems as a function of intracellular Ca<sup>2+</sup> concentrations in Fig. 3. These results predict that, at resting levels of intracellular Ca<sup>2+</sup> of approximately 10<sup>-7</sup> mol l<sup>-1</sup>, the Ca<sup>2+</sup> pump activities exceed the Na<sup>+</sup>/Ca<sup>2+</sup> exchange activities in freshwater and seawater BLMs by factors of 1.8 and 1.5, respectively. At 10<sup>-6</sup> mol l<sup>-1</sup> Ca<sup>2+</sup>, the activity of the exchanger exceeds that of the pump by a factor of 1.2 in freshwater and in seawater BLMs.

#### Discussion

The activities of three ion carriers in the basolateral membrane from gill epithelium of freshwater and seawater tilapia were measured *in vitro*. The Na<sup>+</sup>/Ca<sup>2+</sup> exchange activity in this membrane displayed similar kinetics ( $V_{\max}$ ,  $K_m$ ) in freshwater and seawater gills. The ATP-driven Ca<sup>2+</sup> pump showed a somewhat lower affinity for Ca<sup>2+</sup> in BLMs isolated

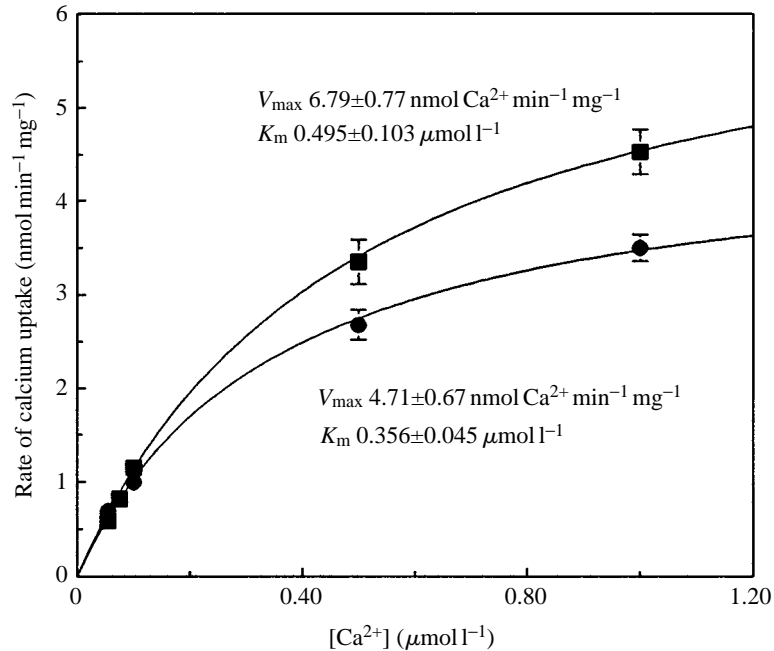

Fig. 2.  $\text{Ca}^{2+}$ -dependence of ATP-driven  $\text{Ca}^{2+}$  uptake in basolateral membranes from freshwater- (FW, filled circles) and seawater- (SW, filled squares) adapted tilapia. The  $V_{\max}$  and  $K_m$  values were the average values of seven gill membrane preparations (for further details see Materials and methods). The  $K_m$  of SW gills is higher than that of FW gills ( $P < 0.005$ ). Without correction for differences in membrane purification, the  $V_{\max}$  value for SW gills is significantly higher than that for FW gills. However, the  $V_{\max}$  values expressed relative to  $\text{Na}^+/\text{K}^+$ -ATPase activity (from Table 2), eliminating the purification differences between the FW and SW membranes, are comparable ( $V_{\max, \text{corr}}$  for FW =  $7.50 \pm 1.08 \text{ nmol Ca}^{2+} \mu\text{mol}^{-1} \text{P}_i$  and for SW =  $7.38 \pm 0.84 \text{ nmol Ca}^{2+} \mu\text{mol}^{-1} \text{P}_i$ ). Mean values  $\pm$  standard errors are presented.

from seawater gills than in BLMs from freshwater gills, whereas  $V_{\max}$  was the same. The significance of this change in  $K_m$  for cellular calcium transport is discussed below (*Ca<sup>2+</sup> transport across the basolateral membrane*). The  $V_{\max}$  values were expressed relative to  $\text{Na}^+/\text{K}^+$ -ATPase activity to eliminate purification-dependent differences between BLM preparations. This correction allows a comparison of the relative density of the carriers between freshwater and seawater gills. Because the  $V_{\max}$  values of the exchanger and the  $\text{Ca}^{2+}$  pump do not differ in BLMs from freshwater and seawater fish, it follows that the density of these carriers is similar in freshwater and seawater gills. Total exchanger capacities, calculated as the product of  $V_{\max}$  and total protein in the homogenate (and adjusted to 100% IOV and 100% recovery), amount  $2297 \pm 566$  and  $2294 \pm 650 \mu\text{mol Ca}^{2+} \text{h}^{-1}$  at  $37^\circ\text{C}$  in freshwater and seawater gills, respectively. Total  $\text{Ca}^{2+}$  pump capacities, calculated in the same way, amount to  $877 \pm 125$  and  $998 \pm 113 \mu\text{mol Ca}^{2+} \text{h}^{-1}$  in freshwater and seawater branchial epithelium (average total protein in homogenates was 92 mg for freshwater gills and 103 mg for seawater gills). The branchial  $\text{Ca}^{2+}$  influx



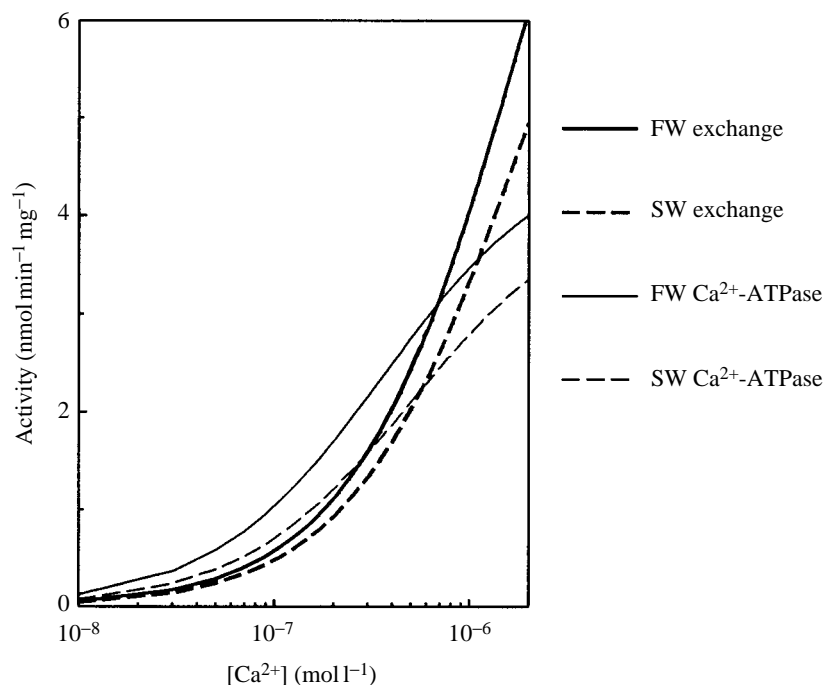

Fig. 3. Activities of the basolateral plasma membrane Ca<sup>2+</sup> pump (Ca<sup>2+</sup>-ATPase) and the Na<sup>+</sup>/Ca<sup>2+</sup> exchanger in gills from seawater- and freshwater-adapted tilapia as a function of intracellular Ca<sup>2+</sup> concentration.

*in vivo* for a tilapia of the same size (approximately 7.5  $\mu\text{mol h}^{-1}$  at 25 °C; Flik *et al.* 1985a; G. Flik, personal observations) is a factor 212 [carrier capacity (2297+877) corrected for the temperature difference assuming an activation energy of 57.9 kJ mol<sup>-1</sup>, as reported for the eel gill (Flik *et al.* 1984) divided by 7.5] lower than the total Ca<sup>2+</sup> transport capacity in the plasma membrane compartment. This indicates a significant overcapacity to transport Ca<sup>2+</sup>.

In this study, we have compared freshwater tilapia with fish adapted to sea water for 8–12 weeks. The plasma composition (Table 1) shows slight, insignificant, increases in calcium, sodium and chloride concentrations which, collectively, appear to be responsible for the 6% increase in plasma osmolarity in seawater tilapia. These observations indicate successful ionoregulation under these widely differing water conditions and thus illustrate the euryhalinity of this fish species.

#### Membrane biology

Mixed populations of of right-side-out (ROV), inside-out (IOV) and leaky BLMVs were used in the *in vitro* determinations. One could argue that the activities of the pump and the exchanger should only be compared directly if the Na<sup>+</sup>/Ca<sup>2+</sup> exchange activity is measured in IOVs only, as is the case for the ATP-dependent Ca<sup>2+</sup> transport. This has indeed been shown in several mixed-vesicle preparations, in Ca<sup>2+</sup> affinity studies

(Schoenmakers and Flik, 1992) and in an experiment in which chemical blocking of the cytosolic side of the exchanger completely inhibited  $\text{Na}^+/\text{Ca}^{2+}$  exchange in a mixed population of IOVs and ROVs (Li *et al.* 1991).

We can only speculate about the reason for the difference in branchial BLM purification between seawater and freshwater gills (Table 2). It is plausible that the looser character of the branchial epithelium in sea water (Sardet *et al.* 1979; Foskett *et al.* 1981) leads to a more effective dispersion of the cells in the isolation procedure, which subsequently results in a higher yield of basolateral membranes. Changes in the lipid fraction of the gills after a shift from fresh water to sea water, as reported for eels (Hansen, 1975), could also influence the effectiveness of our BLM isolation procedure.

#### *Ca<sup>2+</sup> transport across the basolateral membrane*

Although the  $V_{\max}$  of the exchanger is roughly 2.5 times higher than that of the  $\text{Ca}^{2+}$  pump, the exchanger's relative contribution to  $\text{Ca}^{2+}$  excretion at a physiological cellular  $\text{Ca}^{2+}$  concentration will be lower than that of the pump because of its low affinity for  $\text{Ca}^{2+}$ . Only at concentrations of  $10^{-6} \text{ mol l}^{-1}$  or more does the  $\text{Na}^+/\text{Ca}^{2+}$  exchanger become a major transport system (from cytoplasm to blood) (Fig. 3). We conclude, on the basis of kinetic data obtained from isolated plasma membranes, that  $\text{Ca}^{2+}$  transport may depend for a substantial part on the  $\text{Na}^+/\text{Ca}^{2+}$  exchanger (giving the model depicted in Fig. 4), because the relative contribution of the exchanger to the transport of  $\text{Ca}^{2+}$  is intermediate when compared with its minor role in rat intestine and rat kidney (Ghijsen *et al.* 1983; Van Heeswijk *et al.* 1984) and its major role in tilapia intestine (Flik *et al.* 1990). At concentrations higher than  $10^{-6} \text{ mol l}^{-1}$ , which are unlikely to occur intracellularly, the exchanger becomes the major  $\text{Ca}^{2+}$  transport system. In this *in vitro* study, the presence of the  $\text{Ca}^{2+}$  transporters and their kinetic properties have been determined. Clearly, other studies with intact epithelia are needed to obtain direct evidence for the contribution to  $\text{Ca}^{2+}$  transport of each transporter *in vivo*. The effect of ouabain on net calcium transport should be evaluated, as was done for rat small intestine (Ghijsen *et al.* 1983) and fish intestine (Flik *et al.* 1990), to determine the  $\text{Na}^+$ -dependency (serosal) of the  $\text{Ca}^{2+}$  uptake.

The lower  $\text{Ca}^{2+}$  affinity of the  $\text{Ca}^{2+}$  pump in BLMs from seawater gills compared with that of freshwater gills suggests a more important role for the exchanger in  $\text{Ca}^{2+}$  influx in sea water (but with no change in affinity). This may mean that, in sea water, the  $\text{Ca}^{2+}$  influx depends on the  $\text{Na}^+$  status to a greater extent than it does in fresh water. However, this extra contribution of exchange activity in seawater BLMs is only marginal at intracellular  $\text{Ca}^{2+}$  concentrations around  $10^{-7} \text{ mol l}^{-1}$ . The difference would only become manifest if the intracellular  $\text{Ca}^{2+}$  concentration rose (to  $10^{-6} \text{ mol l}^{-1}$  or more; Fig. 3). We realize, however, that at present we can only evaluate the contribution of the exchanger to  $\text{Ca}^{2+}$  extrusion on the basis of its  $\text{Ca}^{2+}$  affinity. Changes in  $\text{Na}^+$  affinity may occur, raising the possibility of another mode of regulation. It would, therefore, be very interesting to evaluate the  $\text{Na}^+$ -dependency of the exchanger to see whether the regulation is at the  $\text{Na}^+$  site.

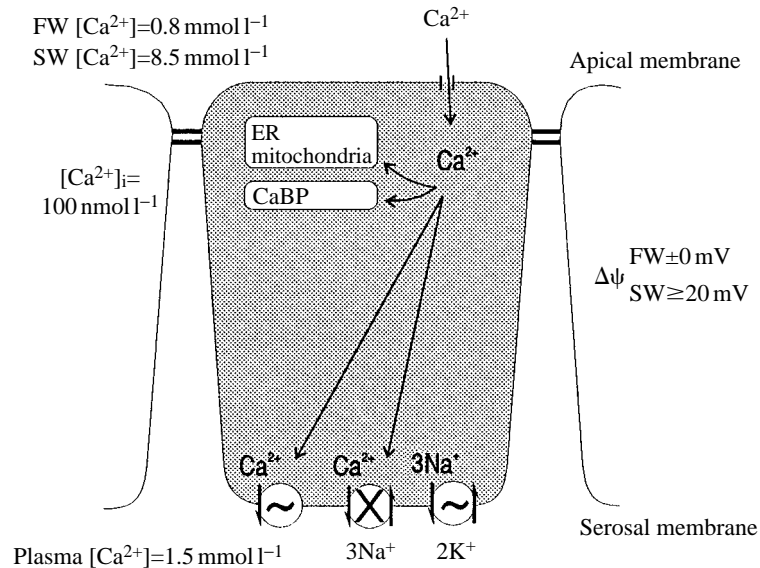

Fig. 4. Diagram of Ca<sup>2+</sup> transport mechanisms present in the plasma membrane of the gills. The Ca<sup>2+</sup>-ATPase, Na<sup>+</sup>/Ca<sup>2+</sup> exchanger and Na<sup>+</sup>/K<sup>+</sup>-ATPase contents of the membrane are similar for freshwater and seawater fish. This suggests that the difference in gill physiology between the freshwater and seawater situations is dictated by other factors. Such factors could include transepithelial potential, the permeability of the apical membrane and the presence (induction) of other carriers. Levels of ionic calcium are indicated (in contrast to Table 1, in which total calcium concentrations are given), since only the ionic form contributes to the electrophysiology. ER, endoplasmic reticulum; CaBP, calcium-binding proteins; Δψ, transepithelial potential.

#### Capacity and function of carriers

A major conclusion drawn from these results is that the fully adapted seawater fish possesses amounts of the exchanger, the Ca<sup>2+</sup> pump and the Na<sup>+</sup>/K<sup>+</sup>-ATPase that are comparable to those of freshwater fish. Apparently, these mechanisms suffice to accomplish Na<sup>+</sup>/Cl<sup>-</sup> extrusion in sea water and to maintain a similar Ca<sup>2+</sup> influx to that in freshwater fish [the rates of branchial Ca<sup>2+</sup> influx do not differ for freshwater and seawater fish; data from Mayer-Gostan *et al.* (1983) on killifish and G. Flik (unpublished data) on eel]. The similar levels of Ca<sup>2+</sup> transport capacity indicate that, in both freshwater and seawater gills, Ca<sup>2+</sup> may be absorbed transcellularly. This assumption is further supported by two findings. First, stanniocalcin, the hypocalcaemic fish hormone, circulates at higher concentrations and has a higher turnover rate in seawater fish (Hanssen *et al.* 1992, 1993) and it is known to exert its inhibitory control through a reduction in transcellular Ca<sup>2+</sup> uptake, also in tilapia (Verbost *et al.* 1993). Second, the transepithelial potential (TEP) measured in seawater fish is never less than the resting potential for Ca<sup>2+</sup> in the gill epithelium of fish in sea water, thus excluding a passive influx of Ca<sup>2+</sup> in seawater fish (resting potential is 21 mV calculated according to the Nernst equation with 8.5 mmol l<sup>-1</sup> Ca<sup>2+</sup> outside and 1.5 mmol l<sup>-1</sup> Ca<sup>2+</sup> inside, whereas

the TEP in seawater fish is greater than 21 mV, based on TEP values given by Maetz and Bornancin, 1975; Young *et al.* 1988).

The total branchial  $\text{Na}^+/\text{K}^+$ -ATPase activity of freshwater tilapia was similar after adaptation to sea water, in contrast to what has been reported for killifish (Epstein *et al.* 1967), eels (Epstein *et al.* 1971; Bornancin and de Renzis, 1972; Utida and Hirano, 1973), coho salmon (Zaugg and McLain, 1970) and some other species (reviewed by Foskett *et al.* 1983). It is believed that the capacity of fish to tolerate hyperosmotic media is linked with their ability to increase the production of this enzyme, thereby gaining a more efficient system for ridding the body of excess salts (Maetz, 1971). When tilapia are gradually transferred to sea water (as performed in this study), the  $\text{Na}^+/\text{K}^+$ -ATPase activity increases only slightly (51 % after stepwise acclimation to sea water in 8 weeks; Dange, 1985) or does not increase at all (this study). We did not measure a difference in  $\text{Na}^+/\text{K}^+$ -ATPase activity 8–12 weeks after the transfer, although there is a transient increase in the activity (2 weeks after transfer,  $40 \pm 8\%$  increase,  $P < 0.01$ ,  $N = 8$ ; G. Flik, personal observations). The densities of chloride cells in the opercular membrane of the freshwater and seawater tilapia were also alike. These cell numbers match data on enzymatic activity and are in agreement with data by Foskett *et al.* (1981) showing that, in tilapia opercular membranes, the number of chloride cells increases only transiently after transfer to sea water. Microscopical evaluation indicated a subsequent hypertrophy of the chloride cells, which was suggested to be correlated with the amount of chloride secretion (Foskett *et al.* 1981), but the corresponding  $\text{Na}^+/\text{K}^+$ -ATPase activity was, unfortunately, not measured. One may conclude from the available data that the differences in branchial  $\text{Na}^+/\text{K}^+$ -ATPase are not necessarily indicative of osmoregulatory responses during seawater adaptation in tilapia (Dange, 1985). In any case, the quantity of  $\text{Na}^+/\text{K}^+$ -ATPase available for  $\text{Na}^+$  uptake in freshwater gills suffices to sustain the  $\text{Na}^+$  and (indirectly)  $\text{Cl}^-$  excretion in seawater gills, which is much more rapid than the  $\text{Na}^+$  uptake in fresh water (Maetz, 1971). This implies that, in freshwater conditions, an unknown but small proportion of the  $\text{Na}^+/\text{K}^+$ -ATPase capacity is used *in vivo*. This, in turn, suggests that the difference in gill physiology between the freshwater and seawater situations is dictated by properties of the epithelium other than the capacity of these plasma membrane carriers. Such other properties could include transepithelial potential (Marshall and Bern, 1980), the permeability of the apical membrane and the presence of other carriers (we have preliminary evidence that, in sea water, a basolateral bumetanide-inhibitable  $\text{Na}^+/\text{K}^+/\text{Cl}^-$  co-transporter is activated and accounts for the high rate of  $\text{Cl}^-$  extrusion, as originally proposed by Silva *et al.* 1977).

The research of P.M.V. has been made possible by a fellowship of the Royal Netherlands Academy of Arts and Sciences (KNAW).

### References

- BORNANCIN, M. AND DERENZIS, G. (1972). Evolution of the branchial sodium outflux and its components, especially the  $\text{Na}^+/\text{K}^+$ -exchange and the  $\text{Na}^+/\text{K}^+$ -dependent ATPase activity during adaptation to seawater in *Anguilla anguilla*. *Comp. Biochem. Physiol.* **43A**, 577–591.
- DANGE, A. D. (1985). Branchial  $\text{Na}^+/\text{K}^+$ -ATPase activity during osmotic adjustments in two freshwater

- euryhaline teleosts, tilapia (*Sarotherodon mossambicus*) and orange chromid (*Etroplus maculatus*). *Mar. Biol.* **87**, 101–107.
- EPSTEIN, F. H., CYNAMON, M. AND MCKAY, W. (1971). Endocrine control of Na<sup>+</sup>/K<sup>+</sup>-ATPase and seawater adaptation in *Anguilla rostrata*. *Gen. comp. Endocr.* **16**, 323–328.
- EPSTEIN, F. H., KATZ, A. I. AND PICKFORD, G. E. (1967). Sodium and potassium activated adenosine triphosphatase of gills: role in adaptation of teleosts to saltwater. *Science* **156**, 1245–1247.
- EVANS, D. H. (1979). Osmotic and ionic regulation by freshwater and marine fishes. In *Environmental Physiology of Fishes* (ed. M. A. Ali), pp. 93–122. New York: Plenum Press.
- FENWICK, J. C. (1989). Calcium exchange across fish gills. In *Vertebrate Endocrinology, Fundamental and Biomedical Implications*, vol. 3 (ed. P. K. T. Pang and M. B. Schreiber), pp. 319–342. New York: Academic Press.
- FLIK, G., FENWICK, J. C., KOLAR, Z., MAYER-GOSTAN, N. AND WENDELAAR BONGA, S. E. (1985a). Whole body calcium flux rates in the cichlid teleost fish *Oreochromis mossambicus* adapted to freshwater. *Am. J. Physiol.* **249**, R432–R437.
- FLIK, G., FENWICK, J. C. AND WENDELAAR BONGA, S. E. (1985b). Active Ca<sup>2+</sup>-transport in plasma membranes of the branchial epithelium of the North American eel *Anguilla rostrata* LeSueur. *Cell* **55**, 265–272.
- FLIK, G., SCHOENMAKERS, TH. J. M., GROOT, J. A., VAN OS, C. H. AND WENDELAAR BONGA, S. E. (1990). Calcium absorption by fish intestine: the involvement of ATP- and sodium-dependent calcium extrusion mechanisms. *J. Membr. Biol.* **113**, 13–22.
- FLIK, G., VAN RIJS, J. H. AND WENDELAAR BONGA, S. E. (1985c). Evidence for high affinity Ca<sup>2+</sup>-ATPase activity and ATP-driven Ca<sup>2+</sup>-transport in membrane preparations of the gill epithelium of the cichlid fish *Oreochromis mossambicus*. *J. exp. Biol.* **119**, 335–347.
- FLIK, G., WENDELAAR BONGA, S. E. AND FENWICK, J. C. (1984). Ca<sup>2+</sup>-dependent phosphatase and Ca<sup>2+</sup>-dependent ATPase activities in eel gill plasma membranes. II. Evidence for transport high-affinity Ca<sup>2+</sup>-ATPase. *Comp. Biochem. Physiol.* **79B**, 9–16.
- FOSKETT, J. K., BERN, H. A., MACHEN, T. E. AND CONNER, M. (1983). Chloride cells and the hormonal control of teleost fish osmoregulation. *J. exp. Biol.* **106**, 255–281.
- FOSKETT, J. K., LOGSDON, C. D., TURNER, T., MACHEN, T. E. AND BERN, H. A. (1981). Differentiation of the chloride extrusion mechanism during seawater adaptation of a teleost fish, the cichlid *Sarotherodon mossambicus*. *J. exp. Biol.* **93**, 209–224.
- GHIJSEN, W. E. J. M., DE JONG, M. D. AND VAN OS, C. H. (1983). Kinetic properties of Na<sup>+</sup>/Ca<sup>2+</sup>-exchange in basolateral plasma membranes of rat small intestine. *Biochim. biophys. Acta.* **730**, 85–94.
- HANSEN, H. J. M. (1975). Changes in the lipid fraction of eel gills after ionizing irradiation *in vitro* and a shift from fresh- to seawater. *Radiat. Res.* **62**, 216–224.
- HANSEN, R. G. J. M., MAYER-GOSTAN, N., FLIK, G. AND WENDELAAR BONGA, S. E. (1992). Influence of ambient calcium levels on stanniocalcin secretion in the European eel (*Anguilla anguilla*). *J. exp. Biol.* **162**, 197–208.
- HANSEN, R. G. J. M., MAYER-GOSTAN, N., FLIK, G. AND WENDELAAR BONGA, S. E. (1993). Stanniocalcin kinetics in freshwater and seawater European eel (*Anguilla anguilla*). *Fish Physiol. Biochem.* (in press).
- LEATHERBARROW, R. J. (1987). *A Non-linear Regression Analysis Program for the IBM PC*. Amsterdam: Elsevier Biosoft.
- LI, Z., NICOLL, D. A., COLLINS, A., HILGEMANN, D. W., FILOTEO, A. G., PENNISTON, J. T., WEISS, J. N., TOMICH, J. M. AND PHILIPSON, K. D. (1991). Identification of a peptide inhibitor of the cardiac sarcolemmal Na<sup>+</sup>/Ca<sup>2+</sup>-exchanger. *J. biol. Chem.* **266**, 1014–1020.
- MAETZ, J. (1971). Fish gills: mechanisms of salt transfer in freshwater and seawater. *Phil. Trans. R. Soc. Lond. B* **262**, 209–251.
- MAETZ, J. (1974). Aspects of adaptation to hypo-osmotic and hyper-osmotic environments. In *Biochemical and Biophysical Perspectives in Marine Biology*, vol. I (ed. D. C. Malins and J. R. Sargent), pp. 1–167. New York: Academic Press.
- MAETZ, J. AND BORNANCIN, M. (1975). Biochemical and biophysical aspects of salt extrusion by chloride cells in teleosts. *Fortschr. Zool.* **23**, 322–362.
- MARSHALL, W. S. AND BERN, H. A. (1980). Ion transport across the isolated skin of teleost, *Gillichthys mirabilis*. In *Epithelial Transport in Lower Vertebrates* (ed. B. Lahlou), pp. 337–350. Cambridge: Cambridge University Press.
- MAYER-GOSTAN, N., BORNANCIN, M., DERENZIS, G., NAON, R., YEE, J. A., SHEW, R. L. AND PANG,

- P. K. T. (1983). Extra-intestinal calcium uptake in the killifish, *Fundulus heteroclitus*. *J. exp. Zool.* **227**, 329–338.
- OGASAWARA, T. AND HIRANO, T. (1984). Effects of prolactin and environmental calcium on osmotic water permeability of the gills in the eel, *Anguilla japonica*. *Gen. comp. Endocr.* **53**, 315–324.
- PERRY, S. F. AND FLIK, G. (1988). Characterization of branchial transepithelial calcium fluxes in freshwater trout, *Salmo gairdneri*. *Am. J. Physiol.* **254**, R491–R498.
- SARDET, C., PISAM, M. AND MAETZ, J. (1979). The surface epithelium of teleostean fish gills: cellular and junctional adaptation of the chloride cell in relation to salt adaptation. *J. Cell Biol.* **80**, 96–117.
- SCHOENMAKERS, TH. J. M. AND FLIK, G. (1992). Sodium-extruding and calcium-extruding sodium/calcium exchangers display similar calcium affinities. *J. exp. Biol.* **168**, 151–159.
- SCHOENMAKERS, T. J. M., VISSER, G. J., FLIK, G. AND THEUVENET, A. P. R. (1992). Chelator: an improved method for computing metal ion concentrations in physiological solutions. *Biotechniques* **12**, 870–879.
- SILVA, P., SOLOMON, R., SPOKES, K. AND EPSTEIN, F. H. (1977). Ouabain inhibition of gill  $\text{Na}^+/\text{K}^+$ -ATPase: relationship to active chloride transport. *J. exp. Zool.* **199**, 419–426.
- TAYLOR, A. (1989). The role of sodium–calcium exchange in sodium-transporting epithelia. In *Sodium–Calcium Exchange* (ed. T. J. A. Allen, D. Noble and H. Reuter), pp. 298–323. Oxford: Oxford University Press.
- UTIDA, S. AND HIRANO, T. (1973). Effects of changes in environmental salinity on salt and water movement in the intestine and gills of the eel, *Anguilla japonica*. In *Responses of Fish to Environmental Changes*. (ed. W. Chavin), pp. 240–267. Springfield: C. C. Thomas.
- VAN HEESWIJK, M. P. E., GEERTSEN, J. A. M. AND VAN OS, C. H. (1984). Kinetic properties of the ATP-dependent  $\text{Ca}^{2+}$  pump and the  $\text{Na}^+/\text{Ca}^{2+}$ -exchange system in basolateral membranes from rat kidney cortex. *J. Membr. Biol.* **79**, 19–31.
- VAN OS, C. H. (1987). Transcellular calcium transport in intestinal and renal epithelial cells. *Biochim. biophys. Acta* **906**, 195–222.
- VERBOST, P. M., BUTKUS, A., ATSMAN, W., WILLEMS, P., FLIK, G. AND WENDELAAR BONGA, S. E. (1993). Studies on stanniocalcin: characterization of bioactive and antigenic domains of the hormone. *Molec. cell. Endocr.* (in press).
- WENDELAAR BONGA, S. E., FLIK, G., BALM, P. H. M. AND VAN DER MEIJ, J. C. A. (1990). The ultrastructure of chloride cells in the gills of the teleost *Oreochromis mossambicus* during exposure to acidified water. *Cell Tissue Res.* **259**, 575–585.
- WENDELAAR BONGA, S. E., LÖWICK, C. J. M. AND VAN DER MEIJ, J. C. A. (1983). Effects of external  $\text{Mg}^{2+}$  and  $\text{Ca}^{2+}$  on branchial osmotic water permeability and prolactin secretion in the teleost fish *Sarotherodon mossambicus*. *Gen. comp. Endocr.* **52**, 222–231.
- YOUNG, P. S., MCCORMICK, S. D., DEMAREST, J. R., LIN, R. J., NISHIOKA, R. S. AND BERN, H. A. (1988). Effects of salinity, hypophysectomy and prolactin on whole-animal transepithelial potential in the tilapia *Oreochromis mossambicus*. *Gen. comp. Endocr.* **71**, 389–397.
- ZALL, D. M., FISHER, D. AND GARNER, M. Q. (1956). Photometric determination of chlorides in water. *Analyt. Chem.* **28**, 1665–1668.
- ZAUGG, W. S. AND MCLAIN, L. R. (1970). Adenosine triphosphatase activity in gills of salmonids: seasonal variations and salt water influence in coho salmon, *Oncorhynchus kisutch*. *Comp. Biochem. Physiol.* **35**, 587–596.
